# Supplementary material for: The chemodynamic antibacterial effect of MnOX nanosheet decorated silicon nanowire arrays
Source: Royal Society of Chemistry journal article supplement (doi:10.1039/d1ma00794g), 2021-11-06
Supplement: d1ma00794g1.pdf [file d1ma00794g1.pdf]

**Supplementary Information for**  
**The chemodynamic antibacterial effect of MnO<sub>x</sub> nanosheets**  
**decorated silicon nanowire arrays**

Mingkang Li,<sup>†</sup> Guize Li,<sup>†</sup> Hongwei Wang\* and Lin Yuan\*

State and Local Joint Engineering Laboratory for Novel Functional Polymeric Materials, College of Chemistry, Chemical Engineering and Materials Science, Soochow University, 199 Ren'ai Road, Suzhou 215123, P. R. China.

<sup>†</sup> These authors contributed equally to this work.

\* Corresponding authors. E-mail: wanghw@suda.edu.cn, yuanl@suda.edu.cn

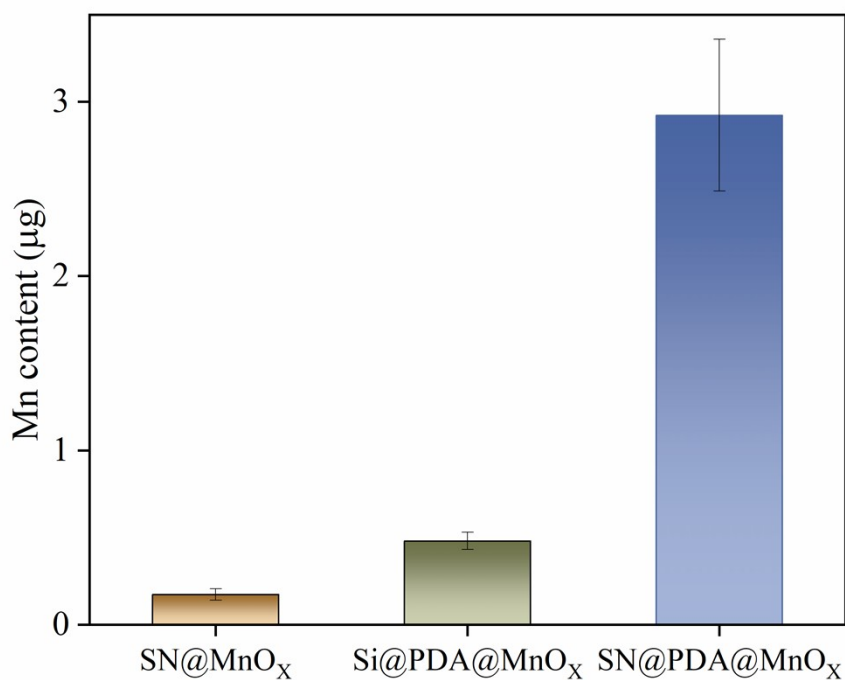

**Fig. S1** SN@MnO<sub>x</sub>, Si@PDA@MnO<sub>x</sub> and SN@PDA@MnO<sub>x</sub> surface Mn content. Data were expressed as mean  $\pm$  SD, n=3.

SN@PDA@MnO<sub>x</sub> was put into a small amount of ultrapure water and was peeled off from the substrate under the action of ultrasound. About 10 ml of aqua regia was used to fully dissolve SN@PDA@MnO<sub>x</sub> in the solution, and then, the aqua regia with SN@PDA@MnO<sub>x</sub> dissolved in it was boiled until about 1 ml remained. The solution was diluted to 10 ml with ultrapure water and subjected to ICP-MS test.
